# Supplementary material for: Microbiome and Metabolome Variation as Indicator of Social Stress in Female Prairie Voles
Source: MDPI journal article supplement (doi:10.3390/ijms24021677), 2023-01-14
Supplement: s1 [file s1]

**Supplemental Table 1. Differences in Fecal Metabolite between T<sub>0</sub> and T<sub>4</sub> in paired vs isolated group**

| <u>Metabolite</u>            | <u>Analysis</u> | <u>Results</u> | <u>Isolated</u> |                | <u>Paired</u> |                |
|------------------------------|-----------------|----------------|-----------------|----------------|---------------|----------------|
|                              |                 |                | <u>Mean</u>     | <u>Std Dev</u> | <u>Mean</u>   | <u>Std Dev</u> |
| <i>Tetradecanoic acid</i>    | T-test          | 0.034          | 31.971          | 93.363         | -69.175       | 72.403         |
| <i>Xylose</i>                | T-test          | 0.088          | 3076.129        | 4865.721       | -1488.912     | 4702.852       |
| <i>Glucose</i>               | Mann-Whitney    | 0.072          | 1530.143        | 4105.073       | -2350.075     | 5014.246       |
| <i>Arabinose</i>             | T-test          | 0.071          | 1167.15         | 1341.074       | -582.569      | 1987.693       |
| <i>O-phosphoethanolamine</i> | Mann-Whitney    | 0.094          | 5.843           | 15.684         | -16.138       | 25.139         |
| <i>Oxamic acid</i>           | Mann-Whitney    | 0.072          | 2.693           | 8.938          | -6.35         | 5.961          |
| <i>N-acetylglucosamine</i>   | T-test          | 0.096          | -6.929          | 159.384        | -168.588      | 185.343        |
| <i>Adipic acid</i>           | Mann-Whitney    | 0.094          | -10.229         | 39.795         | -101.675      | 113.563        |

**Supplemental Table 2. Differences in Fecal Metabolites at T<sub>4</sub>.**

| <u>Metabolites</u>           | <u>Analysis</u> | <u>Results</u> | <u>Isolated</u> |                | <u>Paired</u> |                |
|------------------------------|-----------------|----------------|-----------------|----------------|---------------|----------------|
|                              |                 |                | <u>Mean</u>     | <u>Std Dev</u> | <u>Mean</u>   | <u>Std Dev</u> |
| <i>Succinic acid</i>         | T-test          | 0.036          | 1053.656        | 432.8449       | 636.882       | 389.3606       |
| <i>Tetradecanoic acid</i>    | T-test          | 0.011          | 196.067         | 68.9565        | 109.173       | 66.6781        |
| <i>Glucose</i>               | Log10           | 0.097          | 7614.767        | 3822.3902      | 5272.345      | 4545.8686      |
| <i>Arabinose</i>             | Log10           | 0.088          | 3755.389        | 2600.9074      | 2163.568      | 1309.5832      |
| <i>Galactose</i>             | Log10           | 0.099          | 1444.178        | 812.4141       | 937.555       | 774.5478       |
| <i>Hippuric acid</i>         | Log10           | 0.064          | 418.278         | 572.0355       | 639.118       | 497.2158       |
| <i>N-Acetyl glucosamine</i>  | Mann-Whitney    | 0.08           | 236.722         | 101.5849       | 161.673       | 71.0349        |
| <i>Oxalic acid</i>           | T-test          | 0.091          | 43.411          | 19.4825        | 31.355        | 10.0978        |
| <i>O-phosphoethanolamine</i> | T-test          | 0.082          | 36.933          | 10.0652        | 29.382        | 8.3091         |

**Supplemental Table 3. Differences in Serum Metabolites at T<sub>4</sub> in paired vs isolated group.**

| <u>Metabolite</u>     | <u>Analysis</u> | <u>Results</u> | <u>Isolated</u> |                | <u>Paired</u> |                |
|-----------------------|-----------------|----------------|-----------------|----------------|---------------|----------------|
|                       |                 |                | <u>Mean</u>     | <u>Std Dev</u> | <u>Mean</u>   | <u>Std Dev</u> |
| <i>Hippuric acid</i>  | T-test          | 0.04           | 12.5            | 6.8178         | 19.627        | 8.3211         |
| <i>Lactic acid</i>    | Log10           | 0.057          | 10865.845       | 3496.8387      | 13662.927     | 3435.1915      |
| <i>Sorbitol</i>       | T-test          | 0.053          | 60.624          | 22.7011        | 43.145        | 15.6869        |
| <i>Glyoxylic acid</i> | Mann-Whitney    | 0.088          | 23.618          | 13.1432        | 12.836        | 9.7589         |

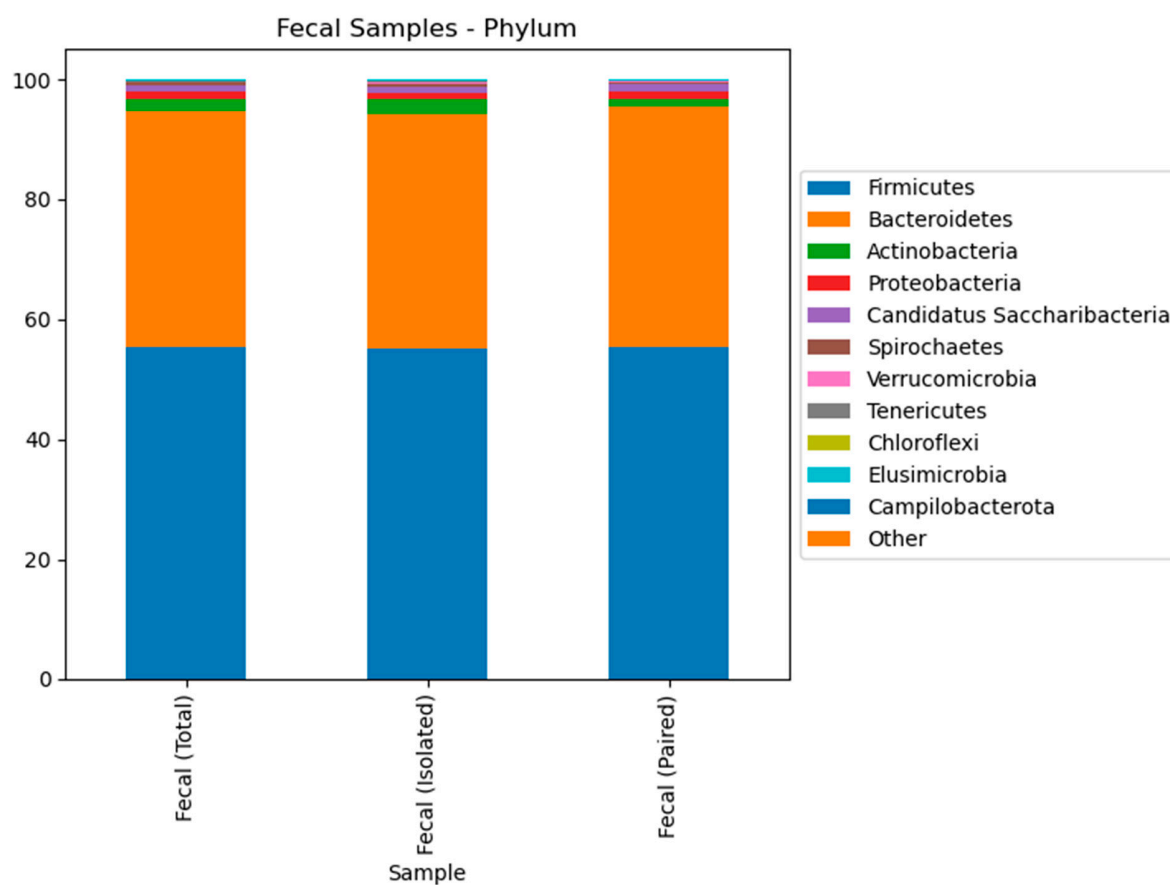

**Supplemental Figure S1.** Firmicutes (55.36%) and Bacteroidetes (39.44%) were the dominant phyla in pooled prairie vole fecal communities, followed by Actinobacteria (1.82%), Proteobacteria (1.24%), and Candidatus Saccharibacteria (1.1%). All other phyla comprised less than 1% of prairie vole fecal communities. Phyla contained in “Other” made up less than 0.01% of fecal communities.

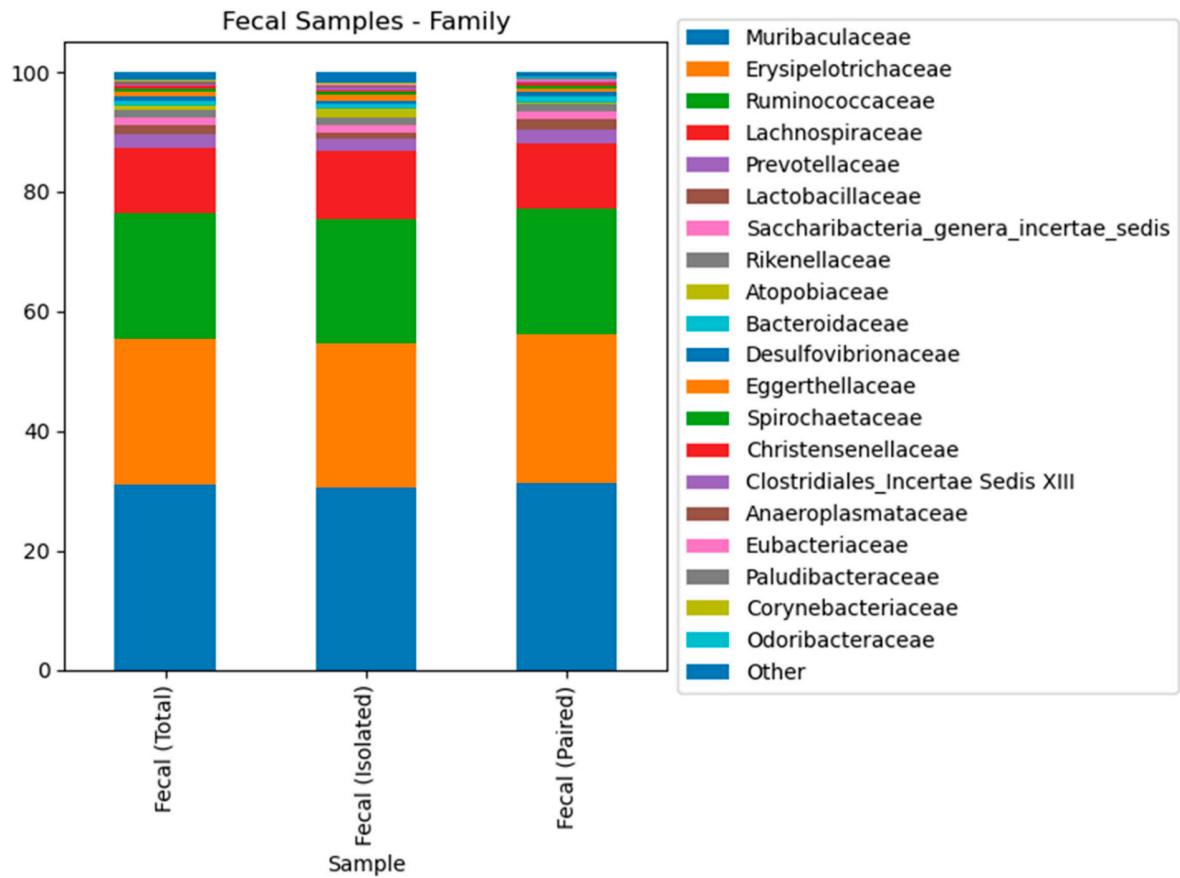

**Supplemental Figure S2.** Muribaculaceae (31.07%), Erysipelotrichaceae (24.44) and Ruminococcaceae (20.92%) were the dominant families in pooled prairie vole fecal communities, followed by Lachnospiraceae (11.02%), Prevotellaceae (2.14%), Lactobacillaceae (1.44%), Saccharibacteria genera incertae sedis (1.28%), and Rikenellaceae (1.24%). All other families comprised less than 1% of prairie vole fecal communities. Families contained in “Other” made up less than 0.1% of fecal communities.

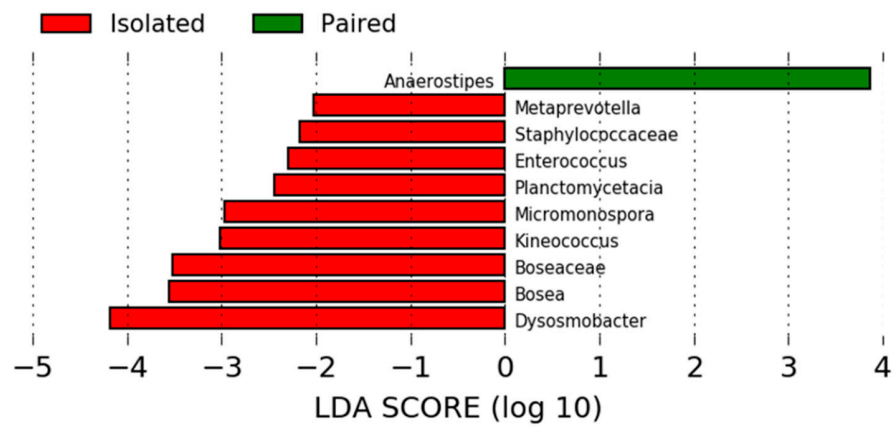

**Supplemental Figure S3.** LEfSe analyses revealed numerous differences in the fecal communities of paired (N = 55) and isolated prairie voles (N = 53). Paired voles had a greater proportional abundance of *Anaerostipes*. Isolated voles had a greater proportional abundance of nine taxa, most notably *Metaprevotella*, *Staphylococcaceae*, and *Enterococcus*.

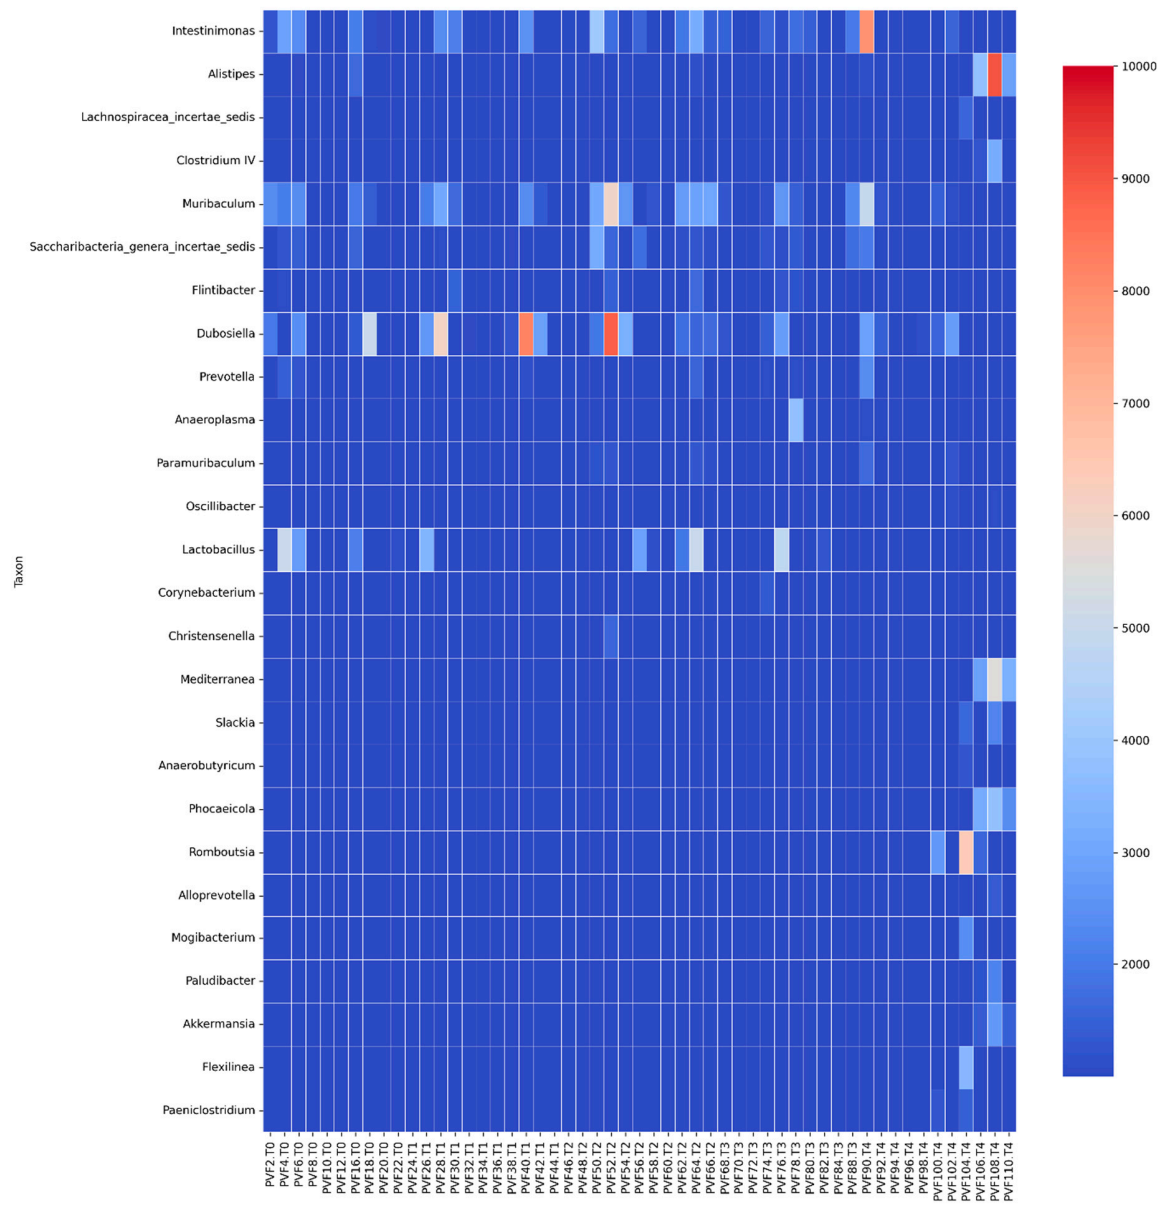

**Supplemental Figure S4.** Variations in taxa in isolated voles begin to emerge at T3 and T4.

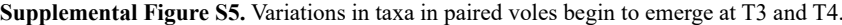

**Supplemental Figure S5.** Variations in taxa in paired voles begin to emerge at T3 and T4.

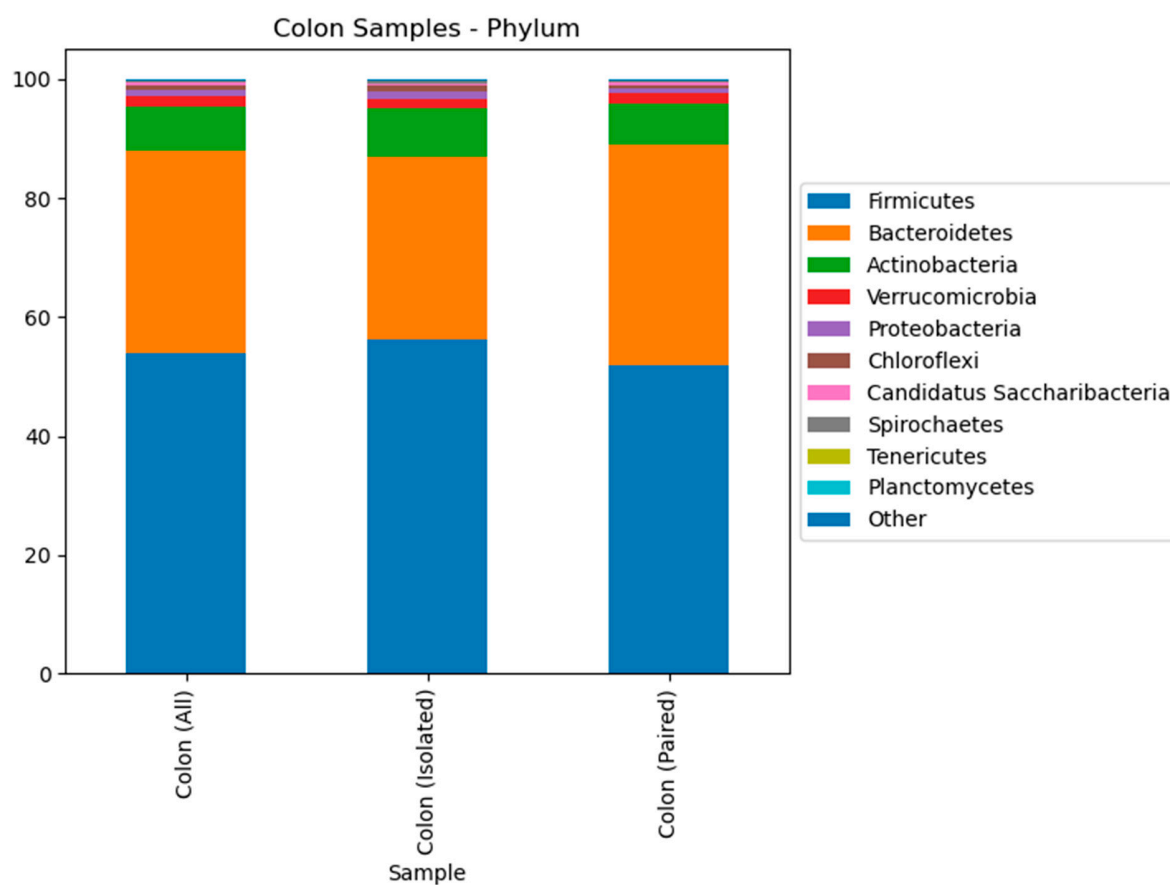

**Supplemental Figure S6.** Firmicutes (54.04%) and Bacteroidetes (33.895%) were the dominant phyla in pooled colon communities followed by Actinobacteria (7.496%), Verrucomicrobia (1.71%), and Proteobacteria (1.06%). All other phyla comprised less than 1% of prairie vole colon communities. Phyla contained in “Other” made up less than 0.05% of colon communities

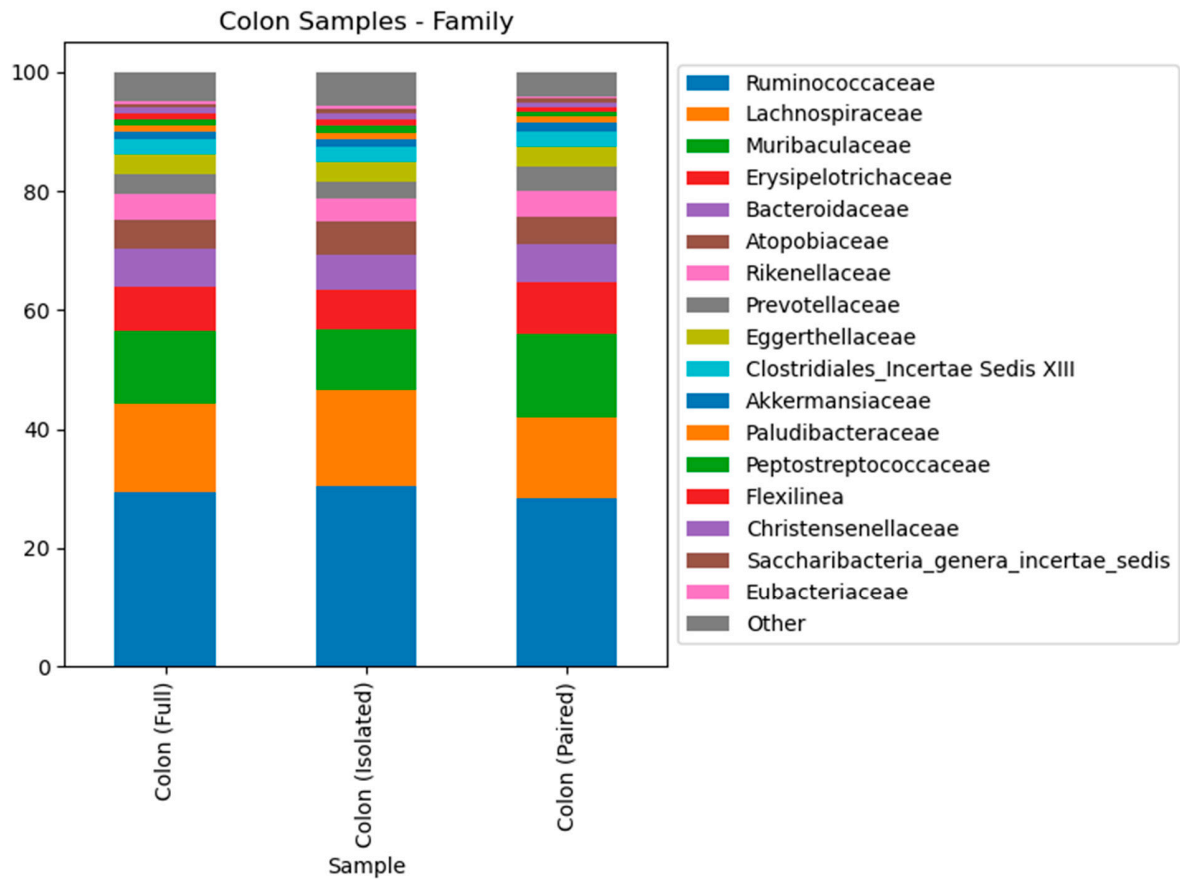

**Supplemental Figure S7.** Ruminococcaceae (29.34%), Lachnospiraceae (14.95%), Muribaculaceae (12.19%) were the dominant families in pooled colon fecal samples followed by Erysipelotrichaceae (7.5%), Bacteroidaceae (6.24%), Atopobiaceae (5.07%), Rikenellaceae (4.16%), Prevotellaceae (3.46%), Eggerthellaceae (3.17%), Clostridiales\_Incertae Sedis XIII (2.62%), Akkermansiaceae (1.38%), Paludibacteraceae (1.05%), and Peptostreptococcaceae (1%). All other families comprised less than 1% of colon communities. Families contained in “Other” made up less than 0.1% of colon communities



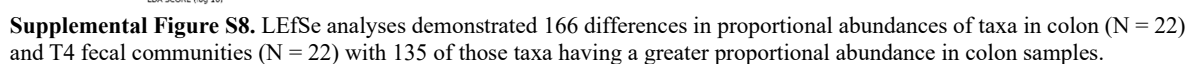

**Supplemental Figure S8.** LEfSe analyses demonstrated 166 differences in proportional abundances of taxa in colon (N = 22) and T4 fecal communities (N = 22) with 135 of those taxa having a greater proportional abundance in colon samples.
