# Supplementary material for: Microbiome and Metabolome Variation as Indicator of Social Stress in Female Prairie Voles
Source: Int J Mol Sci. 2023 Jan 14;24(2):1677. doi: 10.3390/ijms24021677 (PMC9861106; doi:10.3390/ijms24021677)
Supplement: Supplementary file 1 [file ijms-24-01677-s001.zip › Supplemental Table 4.xlsx]

## Sheet: Sheet1
Taxa correlations with behavioral measures
Sample_Type	Social	Behavior	Taxa	Level	Phylum	R	P
Colon	Isolated	Closed (sec)	Mordavella	Genus	Firmicutes	0.843959	0.0042275
Colon	Isolated	Crossings	Elusimicrobium	Genus	Elusimicrobia	-0.762666	0.0168498
Colon	Isolated	Crossings	Elusimicrobiaceae	Family	Elusimicrobia	-0.762666	0.0168498
Colon	Isolated	Crossings	Elusimicrobia	Phylum	Elusimicrobia	-0.757702	0.0180206
Colon	Isolated	Crossings	Rubneribacter	Genus	Actinobacteria	0.874021	0.00206134
Colon	Isolated	Immobility	Catabacteriaceae	Family	Firmicutes	-0.769862	0.0055818
Colon	Isolated	Immobility	Catabacter	Genus	Firmicutes	-0.769862	0.0055818
Colon	Isolated	Open (sec)	Tenericutes	Phylum	Tenericutes	-0.873872	0.00206958
Colon	Isolated	Open (sec)	Anaeroplasma	Genus	Tenericutes	-0.853009	0.00346181
Colon	Isolated	Open (sec)	Anaeroplasmataceae	Family	Tenericutes	-0.853009	0.00346181
Colon	Isolated	Open (sec)	Hungatella	Genus	Firmicutes	-0.811264	0.00795292
Colon	Isolated	Open (sec)	Marseilla	Genus	Bacteroidetes	-0.776477	0.0138617
Colon	Isolated	Open (sec)	Flavonifractor	Genus	Firmicutes	-0.772298	0.0147249
Colon	Paired	Crossings	Lentimicrobiaceae	Family	Bacteroidetes	-0.774033	0.00517441
Colon	Paired	Crossings	Lentimicrobium	Genus	Bacteroidetes	-0.774033	0.00517441
Colon	Paired	Crossings	Catenisphaera	Genus	Firmicutes	-0.774033	0.00517441
Colon	Paired	Crossings	Lysinibacillus	Genus	Firmicutes	-0.758167	0.00684979
Colon	Paired	Crossings	Anaerobacterium	Genus	Firmicutes	-0.754182	0.00732646
Colon	Paired	Crossings	Cellulosilyticum	Genus	Firmicutes	-0.752406	0.00754656
Colon	Paired	Immobility	Mobilisporobacter	Genus	Firmicutes	0.789347	0.00386429
Colon	Paired	Immobility	Caproiciproducens	Genus	Firmicutes	0.793918	0.00352594
Colon	Paired	Open (sec)	Puniceicoccaceae	Family	Verrucomicrobia	0.78443	0.00425447
Colon	Paired	Open (sec)	Acetitomaculum	Genus	Firmicutes	0.794482	0.00348575
Fecal	Isolated	Closed (sec)	Ruminococcus2	Genus	Firmicutes	0.751209	0.0196319
Fecal	Isolated	Crossings	Elusimicrobium	Genus	Elusimicrobia	0.914265	0.000558252
Fecal	Isolated	Crossings	Elusimicrobiaceae	Family	Elusimicrobia	0.914265	0.000558252
Fecal	Isolated	Crossings	Elusimicrobia	Phylum	Elusimicrobia	0.914265	0.000558252
Fecal	Isolated	Open (sec)	Coriobacteriaceae	Family	Actinobacteria	-0.816903	0.00719401
Fecal	Isolated	Open (sec)	Lawsonibacter	Genus	Firmicutes	-0.8165	0.00724658
Fecal	Isolated	Open (sec)	Lancefieldella	Genus	Actinobacteria	-0.815568	0.00736904
Fecal	Isolated	Open (sec)	Oligosphaera	Genus	Lentisphaerae	-0.811392	0.00793518
Fecal	Isolated	Open (sec)	Oligosphaeraceae	Family	Lentisphaerae	-0.811392	0.00793518
Fecal	Isolated	Open (sec)	Adlercreutzia	Genus	Actinobacteria	-0.789223	0.0114392
Fecal	Isolated	Open (sec)	Eggerthella	Genus	Actinobacteria	-0.76581	0.0161351
Fecal	Isolated	Open (sec)	Planctomycetes	Phylum	Planctomycetes	-0.759499	0.0175906
Fecal	Isolated	Open (sec)	Methanobrevibacter	Genus	Euryarchaeota	-0.752752	0.0192406
Fecal	Isolated	Open (sec)	Methanobacteriaceae	Family	Euryarchaeota	-0.750624	0.0197817
Fecal	Isolated	Open (sec)	Jonesiaceae	Family	Actinobacteria	-0.750253	0.0198771
Fecal	Isolated	Open (sec)	Sanguibacter	Genus	Actinobacteria	-0.750253	0.0198771
Fecal	Paired	Immobility	Caryophanon	Genus	Firmicutes	0.751641	0.00764289
Fecal	Paired	Immobility	Selenomonas	Genus	Firmicutes	0.757599	0.00691634
Fecal	Paired	Immobility	Kiloniellaceae	Family	Proteobacteria	0.768303	0.00573997
Fecal	Paired	Immobility	Clostridiaceae 1	Family	Firmicutes	0.795948	0.00338295
Fecal	Paired	Immobility	Clostridium sensu stricto	Genus	Firmicutes	0.801614	0.00300656
Fecal	Paired	Immobility	Mycoplasmoidaceae	Family	Tenericutes	0.825907	0.00173385
Fecal	Paired	Immobility	Malacoplasma	Genus	Tenericutes	0.825907	0.00173385
Fecal	Paired	Immobility	Prevotellamassilia	Genus	Bacteroidetes	0.873953	0.000436049
Fecal	Paired	Open (sec)	Campylobacteraceae	Family	Proteobacteria	0.758608	0.00679849
Fecal	Paired	Open (sec)	Campylobacter	Genus	Proteobacteria	0.758608	0.00679849
Fecal	Paired	Open (sec)	Atopobium	Genus	Actinobacteria	0.759693	0.00667344
Fecal	Paired	Open (sec)	Agrococcus	Genus	Actinobacteria	0.766112	0.00596773
Fecal	Paired	Open (sec)	Sporomusaceae	Family	Firmicutes	0.780058	0.00462518
Fecal	Paired	Open (sec)	Baekduiaceae	Family	Actinobacteria	0.78443	0.00425447
Fecal	Paired	Open (sec)	Jonesiaceae	Family	Actinobacteria	0.78443	0.00425447
Fecal	Paired	Open (sec)	Actinobaculum	Genus	Actinobacteria	0.78443	0.00425447
Fecal	Paired	Open (sec)	Baekduia	Genus	Actinobacteria	0.78443	0.00425447
Fecal	Paired	Open (sec)	Desertimonas	Genus	Actinobacteria	0.78443	0.00425447
Fecal	Paired	Open (sec)	Clavibacter	Genus	Actinobacteria	0.78443	0.00425447
Fecal	Paired	Open (sec)	Sanguibacter	Genus	Actinobacteria	0.78443	0.00425447
Fecal	Paired	Open (sec)	Acetobacteroides	Genus	Bacteroidetes	0.78443	0.00425447
Fecal	Paired	Open (sec)	Syntrophobotulus	Genus	Firmicutes	0.78443	0.00425447
Fecal	Paired	Open (sec)	Pseudoramibacter	Genus	Firmicutes	0.78443	0.00425447
Fecal	Paired	Open (sec)	Neobacillus	Genus	Firmicutes	0.78443	0.00425447
Fecal	Paired	Open (sec)	Moryella	Genus	Firmicutes	0.78443	0.00425447
Fecal	Paired	Open (sec)	Desulfonispora	Genus	Firmicutes	0.78443	0.00425447
Fecal	Paired	Open (sec)	Pasteurellaceae	Family	Proteobacteria	0.78443	0.00425447
Fecal	Paired	Open (sec)	Cystobacteraceae	Family	Proteobacteria	0.78443	0.00425447
Fecal	Paired	Open (sec)	Metakosakonia	Genus	Proteobacteria	0.78443	0.00425447
Fecal	Paired	Open (sec)	Opitutus	Genus	Verrucomicrobia	0.78443	0.00425447
